# Supplementary material
Source: publisher site journal article supplement (https://www.dovepress.com/article/316361)
Supplement: Supplementary file 1 [file get_supplementary_file.php]

Appendix: Rules with CES-D=1 and CES-D=2

| Rule no. | Antecedent | Consequent | No. of the cases in the database | Support (%) | Confidence (%) | Lift |
| --- | --- | --- | --- | --- | --- | --- |
| 1 | Age of PLWD: ≥85 years  Walking ability of PLWD: Independent  Psychological symptoms of PLWD: Delusion  Psychological symptoms of PLWD: Hallucination | CES-D=1 | 9 | 2.55 | 88.89 | 2.16 |
| 2 | Type of dementia: AD  Walking ability of PLWD: Independent  Psychological symptoms of PLWD: Delusion  Caregiver’s mood: Anger | CES-D=1 | 9 | 2.55 | 88.89 | 2.16 |
| 3 | Psychological symptoms of PLWD: Misidentification  Caregiver’s mood: Anger | CES-D=1 | 8 | 2.27 | 87.50 | 2.13 |
| 4 | CDR of PLWD: Moderate dementia  Caregiver’s employment: Employed  Relation to the patient: Child | CES-D=1 | 8 | 2.27 | 87.50 | 2.13 |
| 5 | Age of PLWD: 75-84 years  Frequency of care: ≥6 days per week  Psychological symptoms of PLWD: Misidentification | CES-D=1 | 8 | 2.27 | 87.50 | 2.13 |
| 6 | Gender of PLWD: Male  Age of caregiver: < 50 years  Relation to the patient: Other relatives | CES-D=1 | 8 | 2.27 | 87.50 | 2.13 |
| 7 | Gender of PLWD: Male  Frequency of care: ≥6 days per week  Psychological symptoms of PLWD: Delusion  Psychological symptoms of PLWD: Misidentification | CES-D=1 | 8 | 2.27 | 87.50 | 2.13 |
| 8 | Age of PLWD: ≥85 years old  Type of primary care: Shared caregiving by a caregiver and a foreign worker/household  Psychological symptoms of PLWD: Delusion  Psychological symptoms of PLWD: Hallucination | CES-D=1 | 8 | 2.27 | 87.50 | 2.13 |
| 9 | Type of dementia: Vascular dementia  Caregiver’s employment: Employed  Relation to the patient: Child  Caregiver’s mood: Nervousness | CES-D=1 | 8 | 2.27 | 87.50 | 2.13 |
| 10 | Age of PLWD: 75-84 years  Age of caregiver: < 50 years  Caregiver’s employment: Employed  Type of primary care: Sole caregiver | CES-D=1 | 8 | 2.27 | 87.50 | 2.13 |
| 11 | Caregiver’s employment: Employed  Relation to the patient: Child  Type of primary care: Sole caregiver  Psychological symptoms of PLWD: Delusion | CES-D=1 | 8 | 2.27 | 87.50 | 2.13 |
| 12 | Age of PLWD: ≥85 years  Frequency of care: ≥6 days per week  Psychological symptoms of PLWD: Delusion  Psychological symptoms of PLWD: Hallucination | CES-D=1 | 11 | 3.12 | 81.82 | 1.99 |
| 13 | CDR of PLWD: Mild dementia  Walking ability of PLWD: Independent  Relation to the patient: Child  Caregiver’s mood: Over-reliance | CES-D=1 | 11 | 3.12 | 81.82 | 1.99 |
| 14 | CDR of PLWD: Mild dementia  Walking ability of PLWD: Independent  Relation to the patient: Child  Frequency of care: ≥6 days per week  Caregiver’s mood: Over-reliance | CES-D=1 | 11 | 3.12 | 81.82 | 1.99 |
| 15 | Age of PLWD: 75-84 years  Psychological symptoms of PLWD: Misidentification | CES-D=1 | 10 | 2.83 | 80.00 | 1.95 |
| 16 | CDR of PLWD: Mild dementia  Walking ability of PLWD: Walker or cane  Age of caregiver: < 50 years | CES-D=1 | 10 | 2.83 | 80.00 | 1.95 |
| 17 | Age of PLWD: ≥85 years  Frequency of care: ≥6 days per week  Psychological symptoms of PLWD: Delusion  Mood symptoms of PLWD: Emotional liability | CES-D=1 | 10 | 2.83 | 80.00 | 1.95 |
| 18 | Age of PLWD: ≥85 years  Age of caregiver: 50-59 years  Relation to the patient: Child  Type of primary care: Shared caregiving by a caregiver and a foreign worker/household  Caregiver’s mood: Anxiety | CES-D=1 | 10 | 2.83 | 80.00 | 1.95 |
| 19 | Age of caregiver: 60-69 years  Caregiver’s employment: Employed  Type of primary care: Sole caregiver  Frequency of care: ≥6 days per week | CES-D=2 | 10 | 2.83 | 90.00 | 2.48 |
| 20 | CDR of PLWD: Mild dementia  Walking ability of PLWD: Wheelchair  Caregiver’s mood: Helplessness | CES-D=2 | 9 | 2.55 | 88.89 | 2.45 |
| 21 | CDR of PLWD: Mild dementia  Caregiver’s employment: Unemployed or retired  Mood symptoms of PLWD: Anger  Caregiver’s mood: Anger | CES-D=2 | 9 | 2.55 | 88.89 | 2.45 |
| 22 | Type of dementia: Others  Age of caregiver: 60-69 years  Frequency of care: ≥6 days per week | CES-D=2 | 8 | 2.27 | 87.50 | 2.41 |
| 23 | Age of PLWD: 75-84 years  Type of dementia: AD  Age of caregiver: 60-69 years  Caregiver’s employment: Employed | CES-D=2 | 8 | 2.27 | 87.50 | 2.41 |
| 24 | Walking ability of PLWD: Independent  Age of caregiver: 60-69 years  Caregiver’s employment: Employed  Type of primary care: Sole caregiver  Frequency of care: ≥6 days per week | CES-D=2 | 8 | 2.27 | 87.50 | 2.41 |
| 25 | Age of PLWD: 75-84 years  Type of dementia: AD  Age of caregiver: 60-69 years  Caregiver’s employment: Employed  Frequency of care: ≥6 days per week | CES-D=2 | 8 | 2.27 | 87.50 | 2.41 |
| 26 | Age of caregiver: 60-69 years  Caregiver’s employment: Employed  Type of primary care: Sole caregiver | CES-D=2 | 11 | 3.12 | 81.82 | 2.26 |
| 27 | Age of caregiver: 60-69 years  Relation to the patient: Spouse | CES-D=2 | 10 | 2.83 | 80.00 | 2.21 |
| 28 | Age of caregiver: 60-69 years  Relation to the patient: Spouse  Frequency of care: ≥6 days per week | CES-D=2 | 10 | 2.83 | 80.00 | 2.21 |
| 29 | CDR of PLWD: Mild dementia  Age of caregiver: 60-69 years  Caregiver’s employment: Employed  Frequency of care: ≥6 days per week | CES-D=2 | 10 | 2.83 | 80.00 | 2.21 |
| 30 | Age of PLWD: 75-84 years  Age of caregiver: 60-69 years  Frequency of care: ≥6 days per week  Mood symptoms of PLWD: Anger | CES-D=2 | 10 | 2.83 | 80.00 | 2.21 |
| 31 | Age of PLWD: 75-84 years  CDR of PLWD: Moderate dementia  Relation to the patient: Spouse  Mood symptoms of PLWD: Anger | CES-D=2 | 10 | 2.83 | 80.00 | 2.21 |
| 32 | CDR of PLWD: Very mild dementia  Frequency of care: ≥6 days per week  Caregiver’s mood: Hopelessness  Caregiver’s mood: Over-reliance | CES-D=2 | 10 | 2.83 | 80.00 | 2.21 |
| 33 | CDR of PLWD: Very mild dementia  Caregiver’s employment: Unemployed or retired  Frequency of care: ≥6 days per week  Psychological symptoms of PLWD: Delusion | CES-D=2 | 10 | 2.83 | 80.00 | 2.21 |
| 34 | Gender of PLWD: Male  CDR of PLWD: Very mild dementia  Frequency of care: ≥6 days per week  Caregiver’s mood: Over-reliance | CES-D=2 | 10 | 2.83 | 80.00 | 2.21 |
| 35 | CDR of PLWD: Moderate dementia  Age of PLWD: 60-69 years  Relation to the patient: Spouse  Frequency of care: ≥6 days per week  Mood symptoms of PLWD: Anger | CES-D=2 | 10 | 2.83 | 80.00 | 2.21 |

AD: Alzheimer's disease

PLWD: persons living with dementia
